# Supplementary material
Source: PubMed Central journal article supplement (PMC3293549)
Supplement: supp_M111.287599_jbc.M111.287599-1.pdf [file supp_M111.287599_jbc.M111.287599-1.pdf]

## Amaddii et al. Suppl.Fig. S1

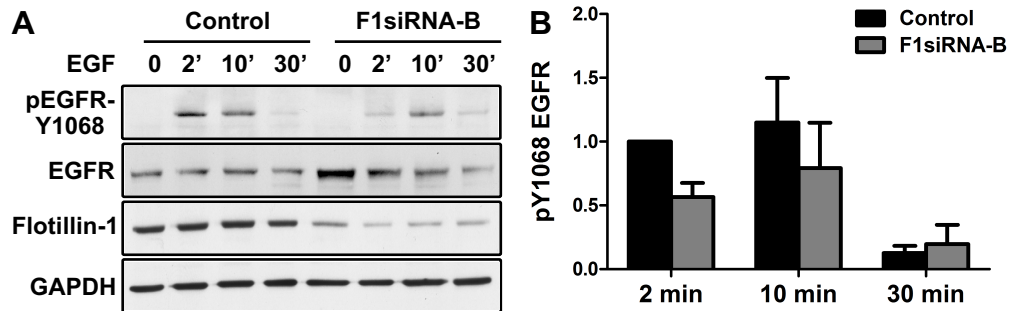

**Suppl. Figure S1: Phosphorylation of Tyr1068 in EGFR is reduced upon flot-1 knockdown.** Knockdown of flot-1 resulted in a decreased phosphorylation of Y1068 (A). B: Bar graph showing a densitometric quantification of the phosphorylation of Y1068. The signals were normalized to the amount of total EGFR. Bars represent the mean  $\pm$  SD of at least three individual experiments. For experimental details, see legend to Fig. 1.
