# Supplementary material
Source: PubMed Central journal article supplement (PMC3293549)
Supplement: supp_M111.287599_jbc.M111.287599-2.pdf [file supp_M111.287599_jbc.M111.287599-2.pdf]

Amaddii et al. Suppl. Fig. S2

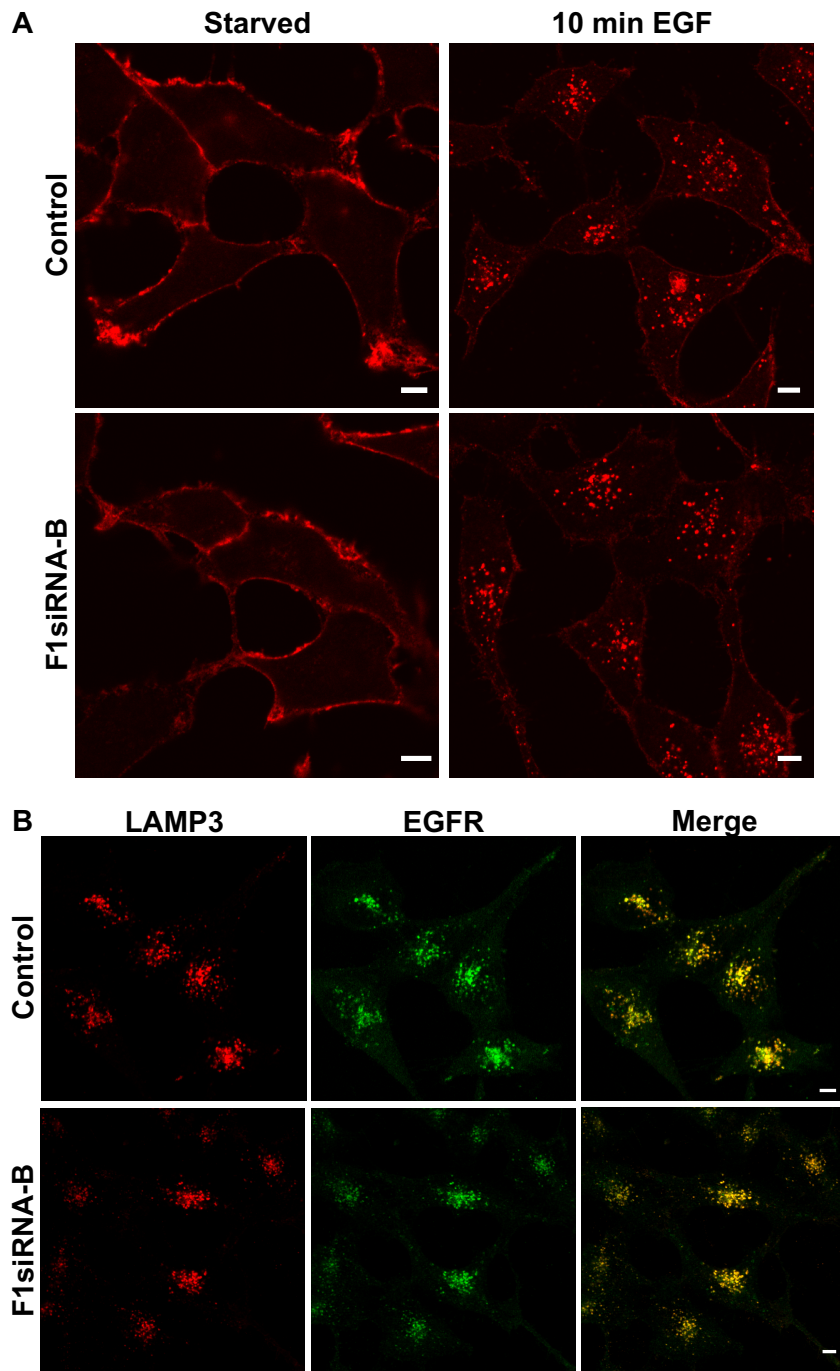

**Suppl. Figure S2: Flot-1 depletion does not inhibit EGFR endocytosis.** A: After 10 min of EGF stimulation, EGFR was efficiently endocytosed into endosomal compartments in cells depleted of flot-1. B: EGFR and LAMP3 colocalized in late endosomes after 15 min EGF stimulation in control and F1-KD cells. For the sake of clarity and space, the counterstaining for flotillin has been omitted in the figure since about 95% of the cells showed a knockdown.
