# Supplementary material
Source: PubMed Central journal article supplement (PMC3293549)
Supplement: supp_M111.287599_jbc.M111.287599-4.pdf [file supp_M111.287599_jbc.M111.287599-4.pdf]

## Amaddii et al. Suppl.Fig. S4

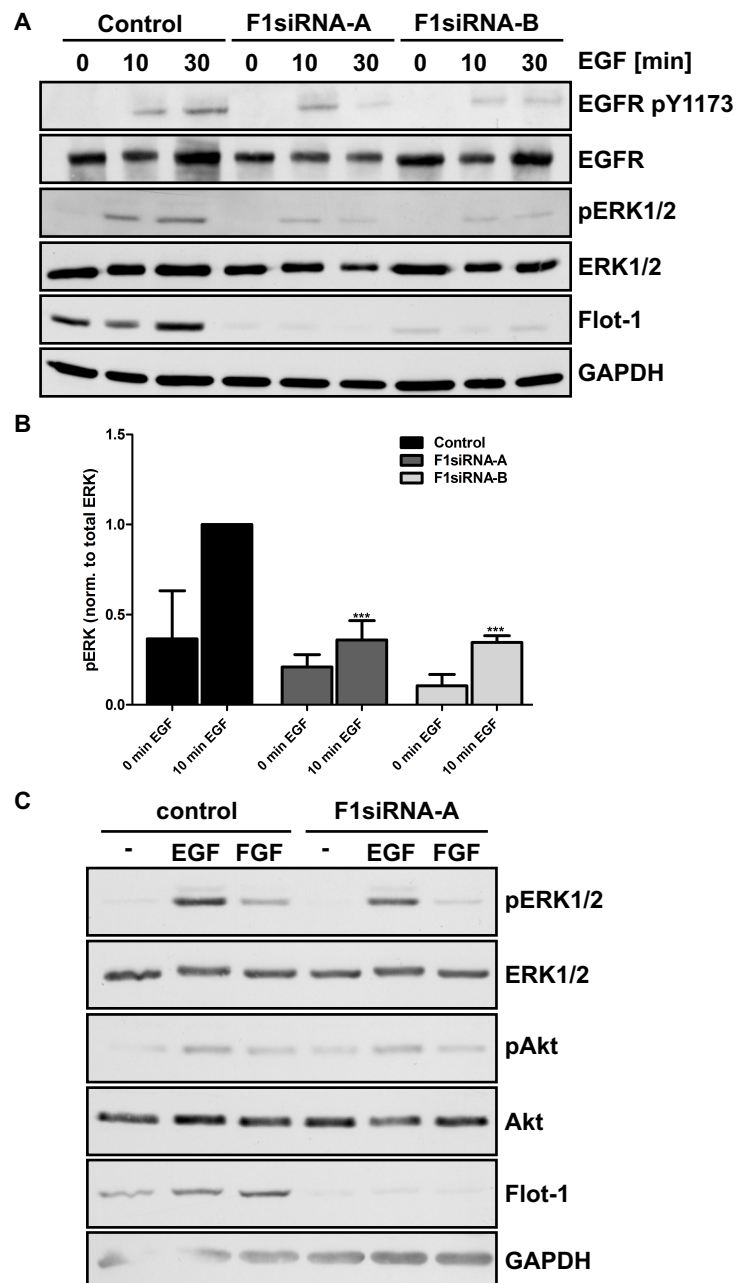

**Suppl. Figure S4: Phosphorylation of EGFR and ERK2 is reduced upon flot-1 knockdown.** Knockdown of flot-1 with two siRNA sequences resulted in a decreased phosphorylation of Y1173 and ERK2 (A). B: Bar graph showing a densitometric quantification of the phosphorylation of ERK2. The signals were normalized to the amount of total EGFR. Bars represent the mean  $\pm$  SD of at least three individual experiments. C: Data of Fig. 7C for EGF and FGF stimulation with the second flot-1 siRNA. For experimental details, see legend to Fig. 7.
